# Supplementary material
Source: Research Square preprint supplement (doi:10.21203/rs.3.rs-9446671/v1)
Supplement: Supplementary file 1 [file c438e512b1973504f713b60c.docx]

**FROM EMPATHY TO INTIMIDATION: A STUDY ON BULLYING AMONG COUNSELING PROFESSIONALS**

Semi-Structured Interview

**Part I. Participant Demographic Information**

| **Participant Information** | | | |
| --- | --- | --- | --- |
| **Name** (optional): |  | **Gender:** |  |
| **Age:** |  | **Marital Status:** |  |
| **Professional Information** | | | |
| **Job title or role:** |  | **Years of professional experience:** |  |
| **Current Work Setting** |  | **Employment Type** (e.g., full-time, part-time, contractual, freelance): |  |
| **Specialization** (e.g., mental health, marriage and family counseling, school counseling, substance abuse counseling, etc.): | |  | |
| **Workplace Information** | | | |
| **Size of the Organization** (e.g., small, medium, large, based on number of employees): |  | **Organizational Culture** (e.g., hierarchical, collaborative, other; self-reported or descriptive input from participants): |  |
| **Workplace Location** (e.g., urban, suburban, rural): | |  | |
| **Bullying-Related Context** | | | |
| **Experience with Workplace Bullying** (e.g., as a victim, witness, both, or neither): |  | **Frequency of Bullying Encountered** (e.g., rarely, occasionally, often, very often): |  |
| **Role of Perpetrator** (e.g., supervisor, peer, subordinate) | |  | |

**Part II. Semi-structured Questionnaire**

| **Section 1:** Background Information |
| --- |
| 1. Can you describe your current role and work environment as a counselor? |
| 1. How many years experience of counseling do you hold? What settings have you practiced? |
| 1. Could you describe the general dynamic of your workplace in brief? What kind of culture do you find at work and among colleagues? |
|  |
| **Section 2.** Experiences with Workplace Bullying |
| 1. Have you ever experienced or witnessed workplace bullying in your counseling career? If yes, can you describe the situation(s)? |
| 1. What specific behaviors or actions would you consider bullying in the context of your workplace? |
| 1. Who were the individuals involved in the bullying incidents (e.g., supervisors, peers, subordinates)? |
|  |
| **Section 3.** Nature and Causes of Bullying |
| 1. What do you think were the factors contributing to the bullying behaviors you experienced or observed? |
| 2. Do you believe there were any organizational factors, such as policies, hierarchy, or workplace culture, that enabled or exacerbated the bullying? |
| 3. Were there any personal characteristics (e.g., lived mental health experiences, gender, professional experience) that you think made you or others more vulnerable to bullying? |
|  |
| **Section 4.** Impacts of Bullying |
| 1. How has workplace bullying affected you personally, including your psychological well-being? |
| 2. Did the bullying incidents have any impact on your professional practice or relationships with clients? |
| 3. How did workplace bullying influence your motivation, job satisfaction, or career decisions? |
|  |
| **Section 5.** Coping and Support |
| 1. How did you cope with or respond to the bullying incidents? |
| 1. Were there any formal or informal support systems available to address the bullying in your workplace? |
| 1. What barriers, if any, did you face when trying to address or report bullying incidents? |
|  |
| **Section 6.** Preventive Strategies and Recommendations |
| 1. In your opinion, what strategies or interventions could help prevent or reduce workplace bullying in counseling settings? |
| 1. What role do you think organizational policies and leadership should play in addressing bullying? |
| 1. Do you have any suggestions for supporting counselors who may be experiencing workplace bullying? |
|  |
| **Section 7.** Reflection |
| 1. Looking back, is there anything you wish you had done differently when dealing with workplace bullying? |
| 2. Is there anything else you would like to share about your experiences or thoughts on workplace bullying in the counseling profession? |

*Thanks for sharing your valuable experience and insights. Your contributions are critical to our understanding in counseling settings and in recognizing the ways in which health and support can be best generated in such environments on behalf of professionals like yourselves. We appreciate your time and openness.*
